# Supplementary material for: An ab initio study on the electronic excited states and photodissociation mechanism of bromocarbene molecule
Source: Royal Society of Chemistry journal article supplement (doi:10.1039/d3cp00985h), 2023-01-01
Supplement: d3cp00985h1.pdf [file d3cp00985h1.pdf]

## Supplementary Information

**Ab initio study on the electronic excited states and photodissociation mechanism of bromocarbene molecule**

**Shimin Shan, Erping Sun, YongQuan Gao, ZiRun Li, Haifeng Xu and Bing Yan**

### Contents

|                      |          |
|----------------------|----------|
| <b>1 Fig. S1-S3.</b> | <b>1</b> |
| <b>2 Fig.S4-S6.</b>  | <b>3</b> |

**1 Fig. S1-S3.**

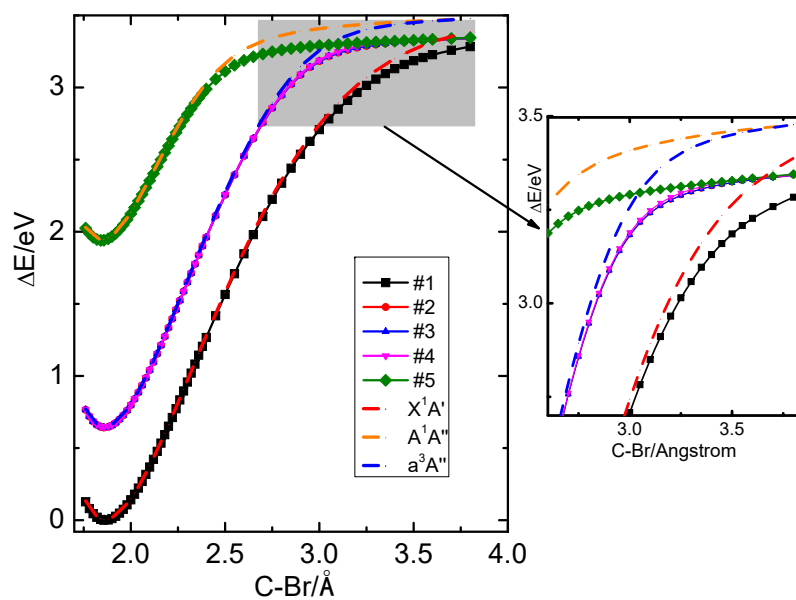

**Fig. 1** Potential energy curves of the lowest three states of CHBr with the spin-orbit coupling (full lines) and without it (dotted lines) calculated at the MRCI-F12/cc-pVTZ-F12 level along the CBr bond length, with the other two geometric parameters fixed at their respective equilibrium values of the ground state.

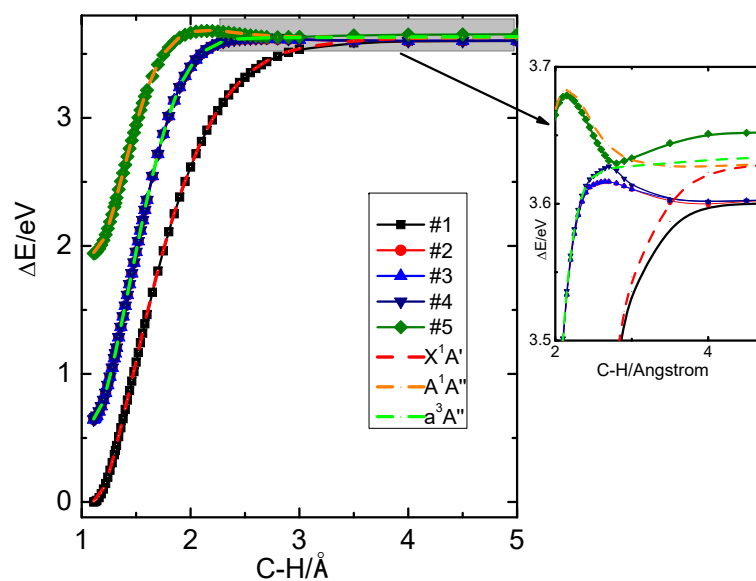

**Fig. 2** Potential energy curves of the lowest three states of CHBr with the spin-orbit coupling (full lines) and without it (dotted lines) calculated at the MRCI-F12/cc-pVTZ-F12 level along the CH bond length, with the other two geometric parameters fixed at their respective equilibrium values of the ground state..

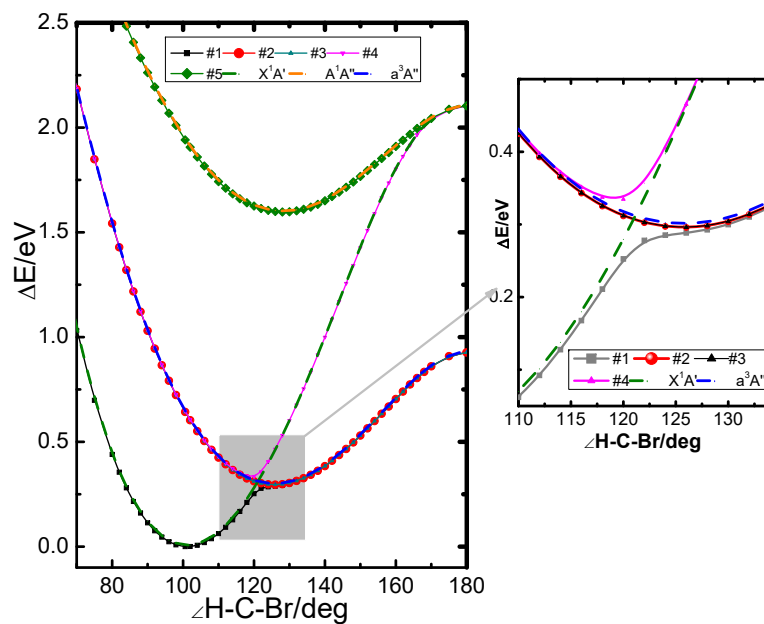

**Fig. 3** Potential energy curves of the lowest three states of CHBr with the spin– orbit coupling (full lines) and without it (dotted lines) calculated at the MRCI-F12/cc-pVTZ-F12 level along the H-C-Br bond angle, with the other two geometric parameters fixed at their respective equilibrium values of the ground state.

**2 Fig.S4-S6.**

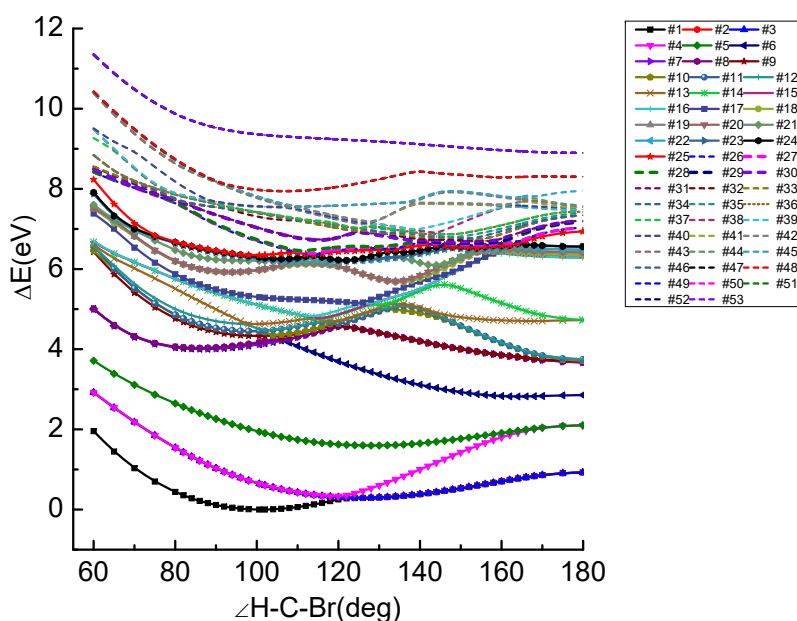

**Fig. 4** Potential energy curves of the spin-coupled states of CHBr calculated at the MRCI-F12/cc-pVTZ-F12 level along the H-C-Br bond angle with the other two geometric parameters fixed at their respective equilibrium values of the ground state.

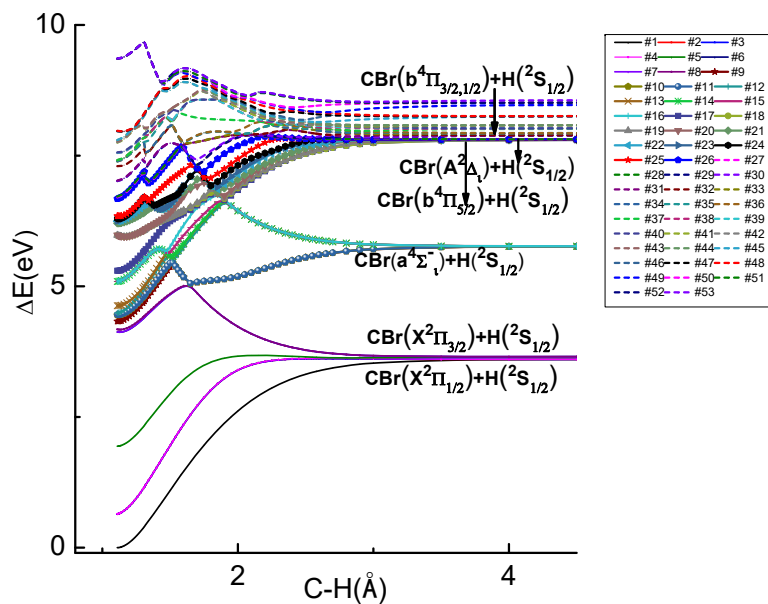

**Fig. 5** Potential energy curves of the spin-coupled states of CHBr calculated at the MRCI-F12/cc-pVTZ-F12 level along the CH bond length with the other two geometric parameters fixed at their respective equilibrium values of the ground state.

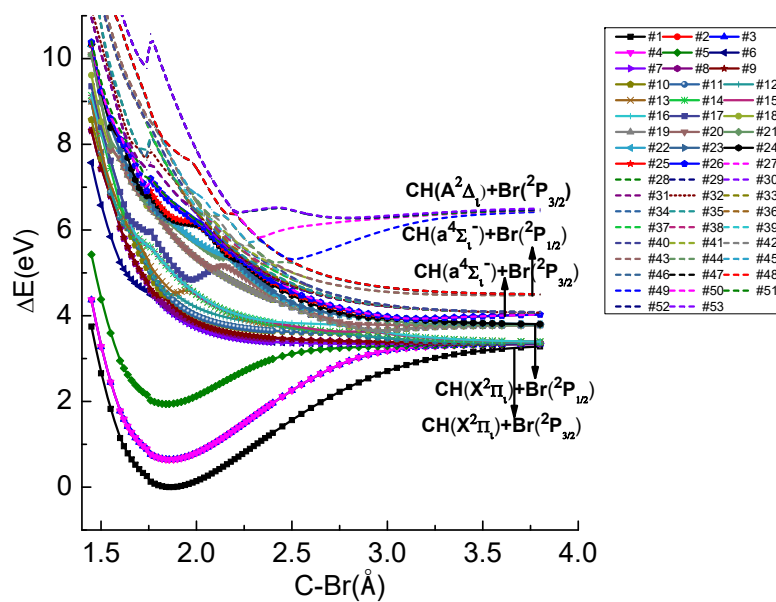

**Fig. 6** Potential energy curves of the spin-coupled states of CHBr calculated at the MRCI-F12/cc-pVTZ-F12 level along the CBr bond length with the other two geometric parameters fixed at their respective equilibrium values of the ground state.
